# Supplementary material for: KRAS mutant colorectal cancer gene signatures identified angiotensin II receptor blockers as potential therapies
Source: PubMed Central journal article supplement (PMC5356876; doi:10.18632/oncotarget.13884), 2016-12-10
Supplement: oncotarget-08-3206-s001.pdf [file oncotarget-08-3206-s001.pdf]

## KRAS mutant colorectal cancer gene signatures identified angiotensin II receptor blockers as potential therapies

### Supplementary Materials

**Supplementary Table S1: Data sets used.** See Supplementary\_Table\_S1

**Supplementary Table S2: List of 133 unique annotated up-regulated genes in the KRAS-MT gene signature.** See Supplementary\_Table\_S2

**Supplementary Table S3: Summary of hypergeometric tests on the enrichment of the target-inhibiting drugs among the top 30 GECM candidates**

| Drug Target Gene Symbol                                  | AGTR1                                                                                   | EGFR                                                   | MAP2K1/2                                                     | ERBB2                                   |
|----------------------------------------------------------|-----------------------------------------------------------------------------------------|--------------------------------------------------------|--------------------------------------------------------------|-----------------------------------------|
| Drug target name                                         | Type-1 angiotensin II receptor                                                          | Epidermal growth factor receptor                       | Dual specificity mitogen-activated protein kinase kinase 1/2 | Receptor tyrosine-protein kinase erbB-2 |
| Hypergeometric test <i>p</i> value                       | 6.57E-06                                                                                | 0.00456                                                | 0.0438                                                       | 0.0438                                  |
| Drug pool size                                           | 1354                                                                                    | 1354                                                   | 1354                                                         | 1354                                    |
| Number of drugs in the pool inhibiting the target        | 7                                                                                       | 5                                                      | 2                                                            | 2                                       |
| Drug name list 1                                         | candesartan<br>eprosartan<br>irbesartan losartan<br>olmesartan<br>telmisartan valsartan | afatinib<br>gefitinib erlotinib<br>lapatinib lidocaine | trametinib bosutinib                                         | afatinib lapatinib                      |
| Number of selected GECM top drugs                        | 30                                                                                      | 30                                                     | 30                                                           | 30                                      |
| Number of drugs inhibiting the target among top selected | 4                                                                                       | 2                                                      | 1                                                            | 1                                       |
| Drug name list 2                                         | eprosartan irbesartan<br>losartan olmesartan                                            | lapatinib lidocaine                                    | trametinib                                                   | lapatinib                               |

List 1 gives the names of all drugs inhibiting the particular target in the pool of 1354 FDA drugs; List 2 are drugs in List 1 that made into the top 30 GECM candidate drugs.

**Supplementary Table S4: The lists of contributive genes to the four ARB drugs.** See Supplementary\_Table\_S4

**Supplementary Table S5: The top 20 candidate drugs (with absolute mean score > 0.25) predicted by GECM to be effective in KRAS-MT CRCs; As can be seen from the last column Diff, 16 out of these 20 compounds turned out to be more sensitive in KRAS-MT cells than in KRAS-WT cells, as indicated by the AUC values; the smaller the more sensitive**

| Compound Name                  | Replicates | Sum Score | Mean Score | Status   | TargetGene             | KRAS-WT AUC | KRAS-MT AUC | Diff   |
|--------------------------------|------------|-----------|------------|----------|------------------------|-------------|-------------|--------|
| selumetinib                    | 467        | -241.0    | -0.972     | clinical | MAP2K1;MAP2K2          | 10.28       | 8.99        | -1.291 |
| trametinib                     | 133        | -234.9    | -0.947     | clinical | MAP2K1;MAP2K2          | 8.49        | 6.78        | -1.707 |
| WZ4002                         | 308        | -217.9    | -0.879     | probe    | EGFR                   | 13.00       | 13.00       | 0.001  |
| tanespimycin                   | 194        | -207.2    | -0.835     | clinical | HSP90AA1               | 10.20       | 10.29       | 0.087  |
| lapatinib                      | 244        | -205.0    | -0.827     | FDA      | EGFR;ERBB2             | 12.49       | 12.75       | 0.263  |
| neratinib                      | 346        | -191.1    | -0.770     | clinical | EGFR;ERBB2             | 11.24       | 10.79       | -0.446 |
| cyanoquinoline 11              | 169        | -159.0    | -0.641     | clinical | MAP3K8                 | 13.50       | 13.17       | -0.329 |
| TG-101348                      | 325        | -156.0    | -0.629     | clinical | JAK2                   | 12.19       | 12.13       | -0.063 |
| saracatinib                    | 304        | -149.1    | -0.601     | clinical | ABL1;SRC               | 12.88       | 12.47       | -0.404 |
| dexamethasone                  | 238        | -146.3    | -0.590     | FDA      | NR3C1                  | 15.30       | 15.12       | -0.177 |
| etoposide                      | 35         | -137.1    | -0.553     | FDA      | TOP2A                  | 13.32       | 13.01       | -0.311 |
| dasatinib                      | 243        | -119.0    | -0.480     | FDA      | EPHA2;KIT;LCK;SRC;YES1 | 11.37       | 10.19       | -1.184 |
| cediranib                      | 67         | -108.5    | -0.437     | clinical | FLT1;FLT4;KDR          | 12.03       | 11.67       | -0.365 |
| canertinib                     | 200        | -104.5    | -0.421     | clinical | EGFR;ERBB2             | 11.70       | 11.73       | 0.022  |
| PF-543                         | 144        | -104.1    | -0.420     | probe    | SPHK1                  | 14.27       | 13.86       | -0.406 |
| staurosporine                  | 159        | -90.4     | -0.365     | probe    |                        | 14.42       | 14.16       | -0.260 |
| epigallocatechin-3-monogallate | 127        | -76.2     | -0.307     | probe    |                        | 13.70       | 13.49       | -0.211 |
| BEC                            | 171        | -74.9     | -0.302     | probe    | ARG1;ARG2              | 15.26       | 14.45       | -0.814 |
| tamatinib                      | 354        | -62.2     | -0.251     | clinical | SYK                    | 14.10       | 13.73       | -0.370 |
| UNC0321                        | 169        | -62.1     | -0.250     | probe    | EHMT2                  | 14.95       | 14.73       | -0.226 |

The accuracy of GECM prediction in the drug's direction of action is 80%.

**Supplementary Table S6: Among the common set of 121 drugs between the Garnett and LINCS collections, the top 13 candidate drugs (with absolute mean score > 0.25) predicted by GECCM to be effective in KRAS-MT CRCs; As can be seen from the last column Diff, 10 out of these 13 drugs turned out to be more sensitive in KRAS-MT cells than in KRAS-WT cells, as indicated by the IC50 values; the smaller the more sensitive**

| Drug Name  | Replicate | Sum Score | Mean Score | Drug Targets         | KRAS-WT-IC50 | KRAS-MT-IC50 | Diff   |
|------------|-----------|-----------|------------|----------------------|--------------|--------------|--------|
| PD-0325901 | 261       | -240.2    | -0.968     | MEK1/2               | -1.150       | -1.697       | -0.548 |
| CI-1040    | 306       | -232.9    | -0.939     | MEK1/2               | 2.340        | 1.683        | -0.657 |
| AZD6244    | 467       | -220.4    | -0.889     | MEK1/2               | 1.633        | 1.200        | -0.433 |
| Lapatinib  | 244       | -183.8    | -0.741     | EGFR, ERBB2          | 4.214        | 2.991        | -1.223 |
| AP-24534   | 132       | -174.7    | -0.704     | ABL                  | 2.191        | 1.967        | -0.223 |
| AUY922     | 416       | -167.7    | -0.676     | HSP90                | -2.677       | -2.637       | 0.040  |
| PF-562271  | 231       | -144.4    | -0.582     | FAK                  | 3.014        | 2.535        | -0.479 |
| AZD-0530   | 304       | -139.5    | -0.562     | SRC, ABL1            | 4.169        | 3.108        | -1.061 |
| Etoposide  | 35        | -126.9    | -0.512     | TOP2                 | 0.963        | 1.656        | 0.694  |
| Dasatinib  | 243       | -113.7    | -0.459     | ABL, SRC, KIT, PDGFR | 3.877        | 1.084        | -2.793 |
| AZD7762    | 237       | -94.4     | -0.381     | CHK1/2               | -0.072       | 1.084        | 1.156  |
| Bosutinib  | 83        | -84.1     | -0.339     | SRC, ABL, TEC        | 3.490        | 3.469        | -0.020 |
| BMS-536924 | 280       | -70.5     | -0.284     | IGF1R                | 1.366        | 0.716        | -0.651 |

The accuracy of GECCM predictions in the drug's direction of action is 77%

**Supplementary Table S7: The list of 286 significant drugs and their overall scores. See Supplementary\_Table\_S7**
